# Supplementary material
Source: publisher figshare collection journal article supplement (https://acs.figshare.com/ndownloader/files/4046617)
Supplement: Supplementary file 1 [file 4046617]

## SUPPORTING INFORMATION

### Phase Transfer of Triangular Silver Nanoprisms from Aqueous to Organic Solvent by an Amide Coupling Reaction

*Lijia Liu and Timothy L. Kelly*

Department of Chemistry, University of Saskatchewan, 110 Science Place, Saskatoon, SK, S7N 5C9,  
Canada

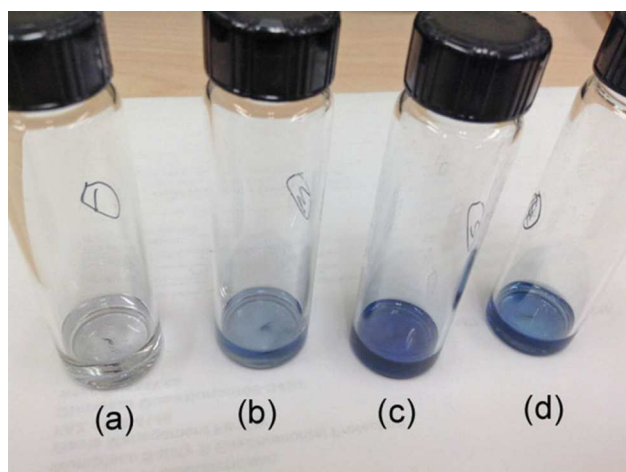

**Figure S1.** Photograph of AgNPrs functionalized using (a) butylamine, (b) hexadecylamine, (c) dioctylamine, and (d) bis(2-ethylhexyl)amine

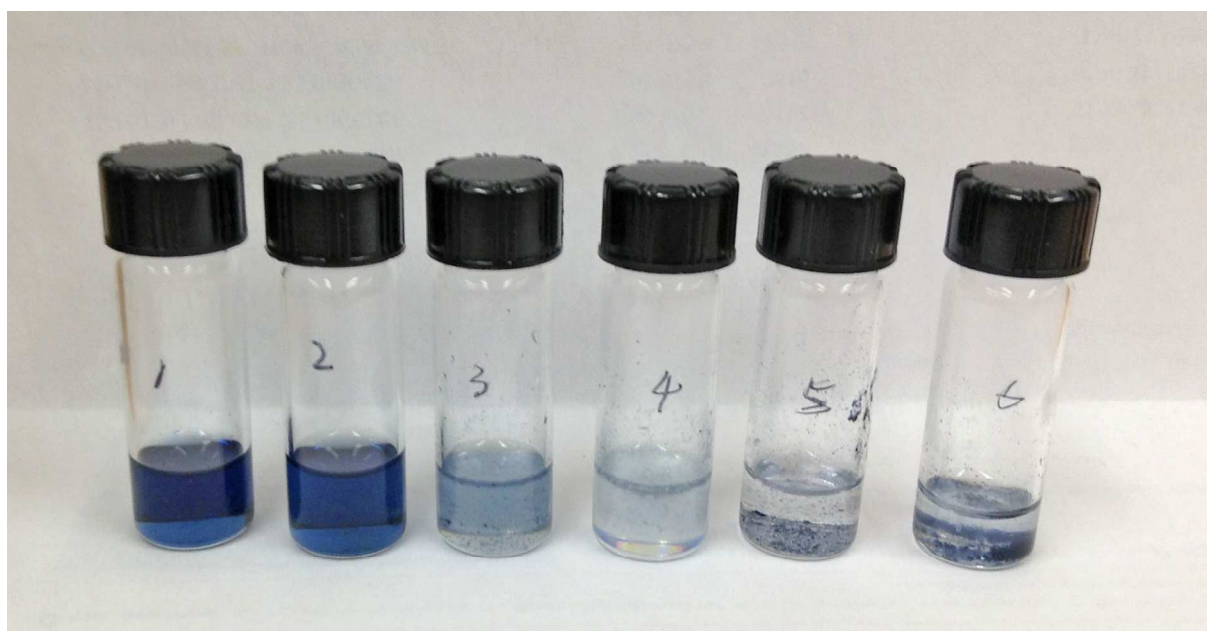

**Figure S2.** Photograph of dicyclohexylamine functionalized AgNPrs dispersed in various organic solvents: 1. chloroform, 2. dichloromethane, 3. chlorobenzene, 4. dichlorobenzene, 5. hexane, 6. toluene

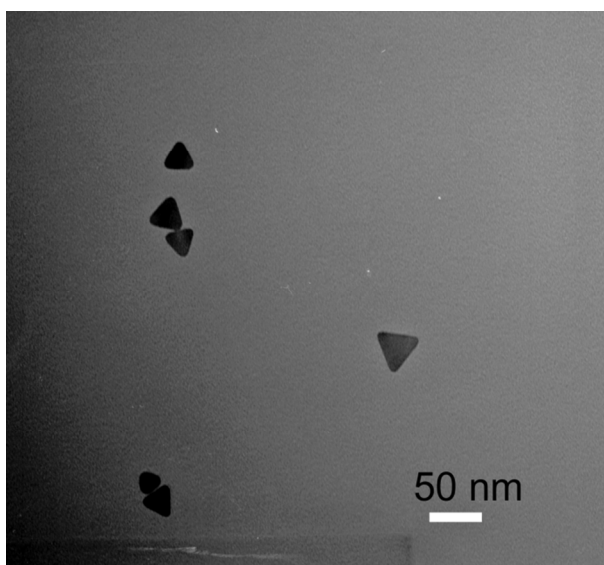

**Figure S3.** TEM image of the as-prepared AgNPrs.

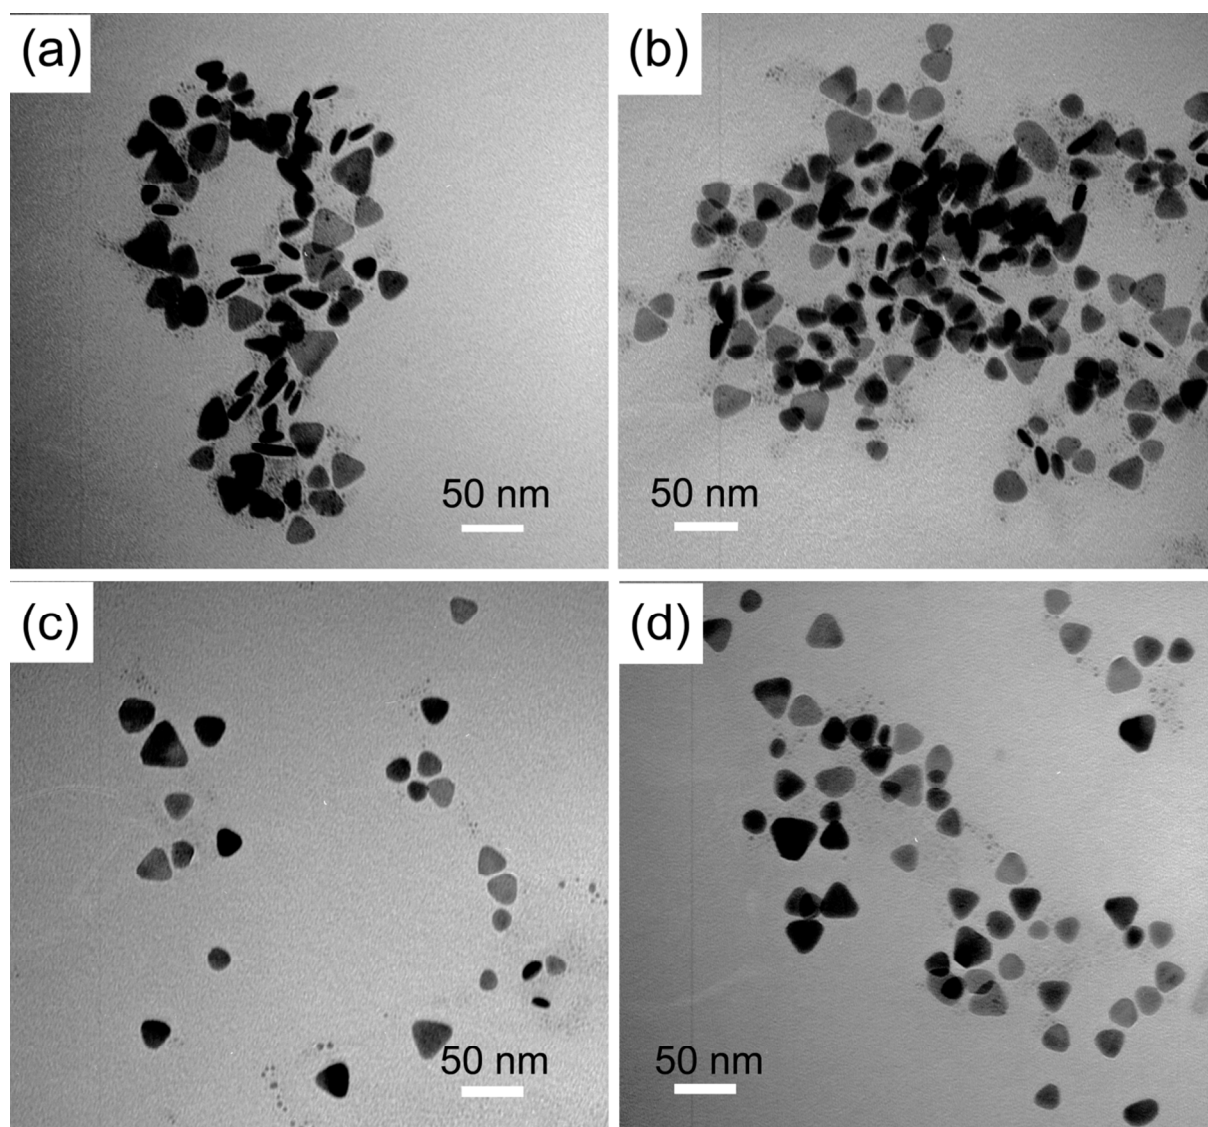

**Figure S4.** TEM images of dicyclohexylamine functionalized AgNPs stored at 4°C for (a) 4 days and (b) 7 days, and diphenylamine functionalized AgNPs stored at 4°C for (c) 4 days and (d) 7 days.

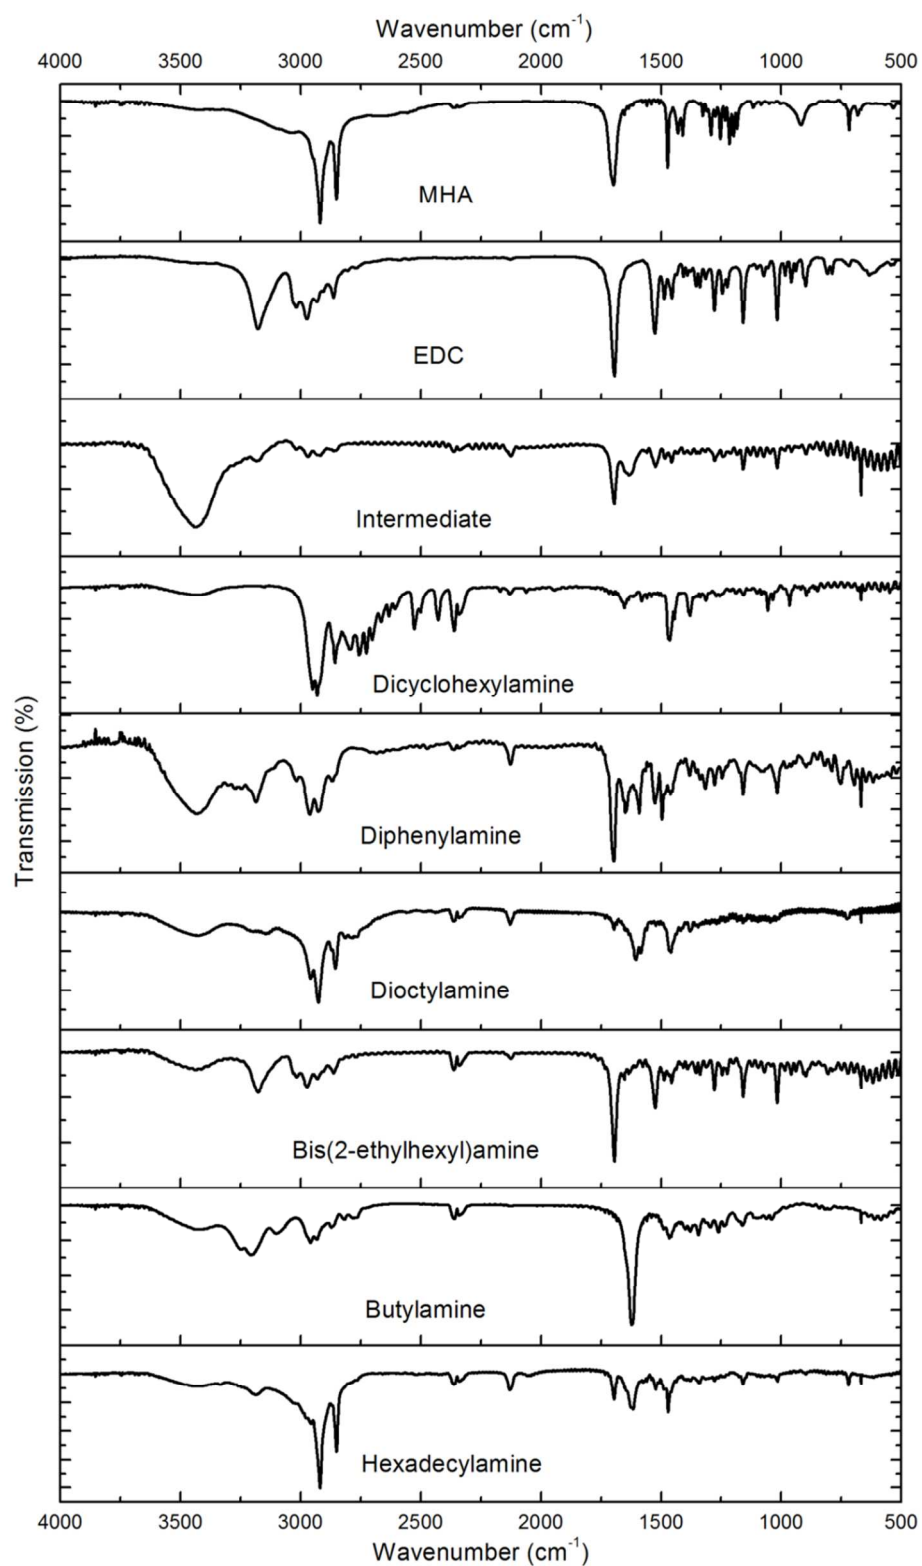

**Figure S5.** FT-IR spectra of MHA, EDC, and AgNPs after functionalization with various amines.

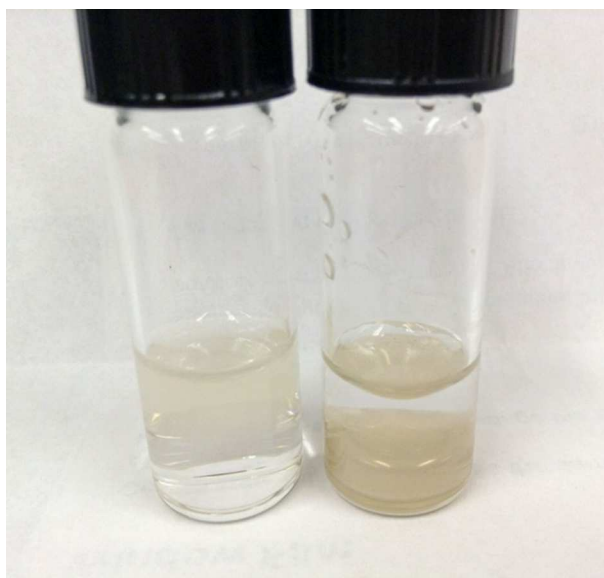

**Figure S6.** Photograph of silver nanospheres before and after phase transfer. Top layer: water, bottom layer, chloroform. Note that the sample on the right is 5 times more concentrated than the one on the left.

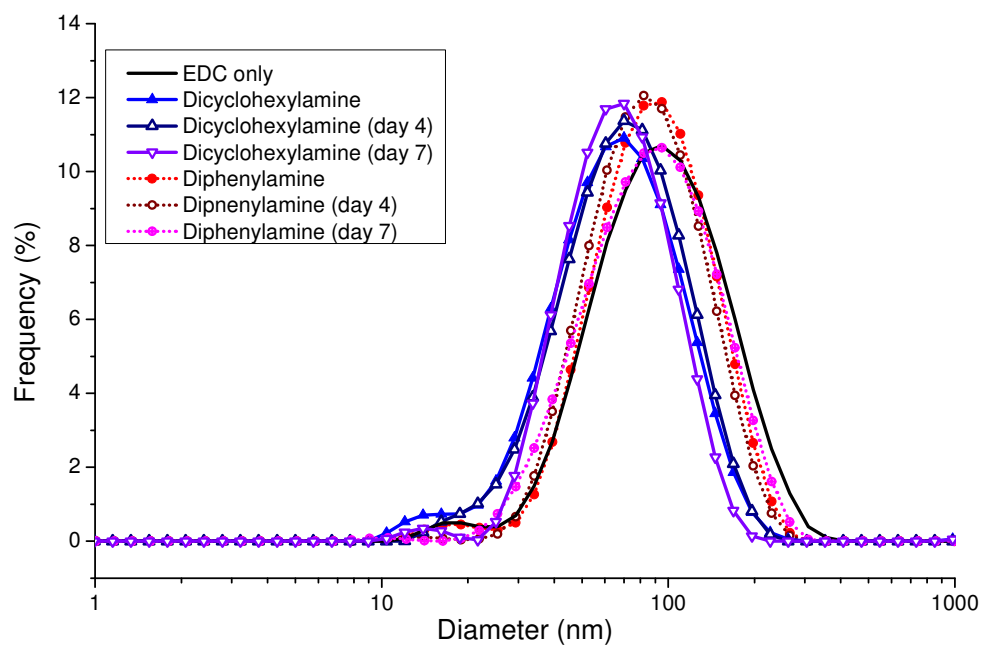

**Figure S7.** Particle size distributions measured by dynamic light scattering as a function of storage time.
